# Supplementary material
Source: PubMed Central journal article supplement (PMC7161083)
Supplement: ma9b02155_si_001.pdf [file ma9b02155_si_001.pdf]

**Oligomer/polymer blend phase diagram and  
surface concentration profiles for  
squalane/polybutadiene: experimental  
measurements and predictions from SAFT- $\gamma$  Mie  
and molecular dynamics simulations**

**Supporting Information**

Jos Tasche,<sup>†</sup> Elise F. D. Sabattié,<sup>†</sup> Richard L Thompson,<sup>†</sup> Mario Campana,<sup>‡</sup> and  
Mark R. Wilson\*,<sup>†</sup>

<sup>†</sup>*Department of Chemistry, Durham University, Lower Mountjoy, Stockton Road, Durham  
DH1 3LE, United Kingdom*

<sup>‡</sup>*Rutherford Appleton Laboratory, Harwell Oxford, Didcot OX11 0QX, United Kingdom*

E-mail: mark.wilson@durham.ac.uk

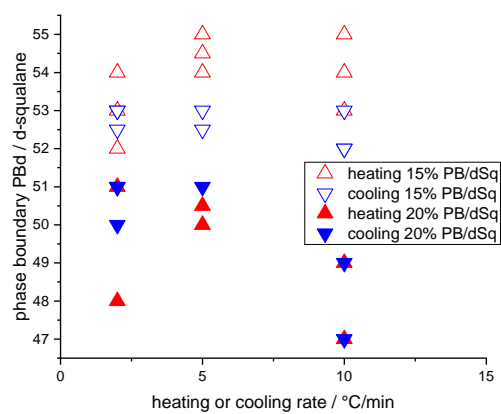

Figure 1: Phase boundaries obtained for PB/d-sq using different heating and cooling rates.

a) Miscible conditions with  $k_{ij} = 0$  showing surface enrichment by oligomers.

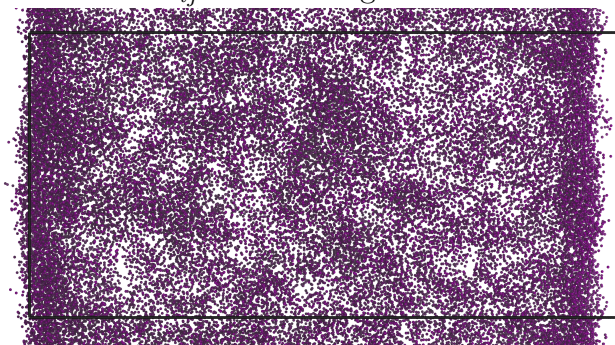

b) Immiscibility condition with  $k_{ij} = +0.02$  showing the formation of a wetting layer and a large droplet of squalane after 360 ns of simulation time (the droplet forms after 100 ns of simulation time from an initial homogeneously mixed system).

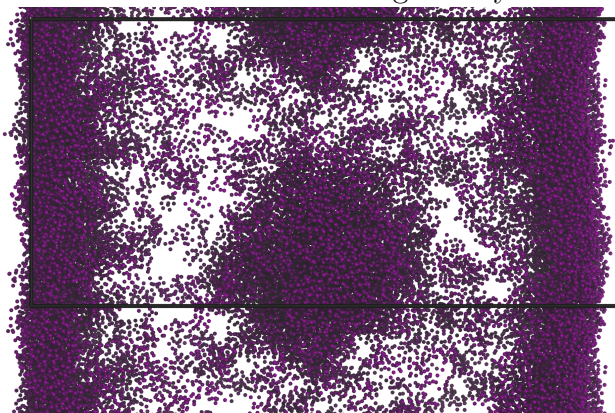

c) Immiscibility condition with  $k_{ij} = +0.02$ : equilibrated system after 1.367  $\mu\text{s}$  of simulation time.

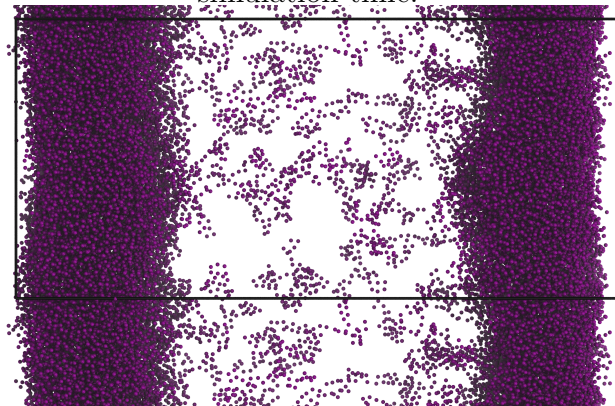

Figure 2: Molecular dynamics snapshots from a 102k bead system at 450 K with 40 w/w% oligomer. Squalane beads are shown in palatinate purple, PB polymer beads are not shown for clarity. The black box represents the explicitly modelled unit cell.

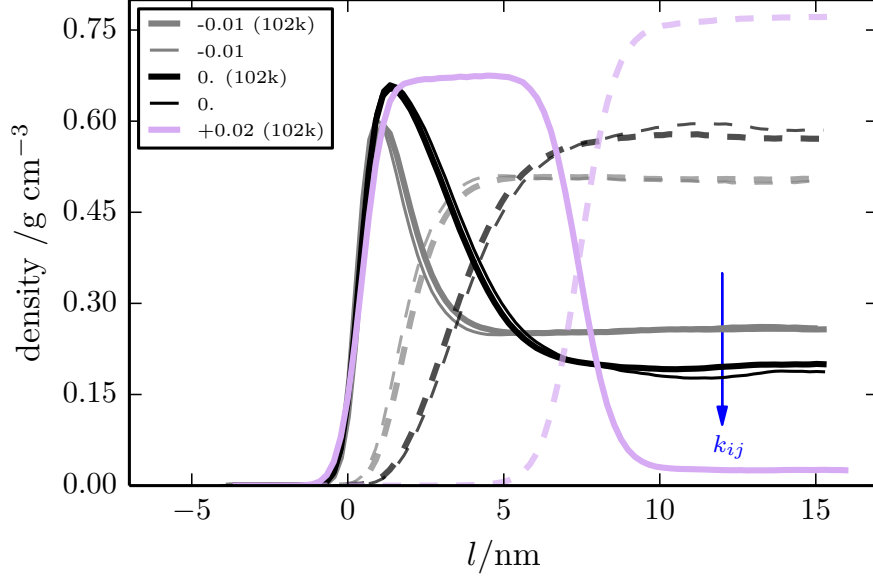

Figure 3: Squalane and polymer surface density profiles obtained by CGMD at 450 K for systems with differing unlike interaction parameter  $k_{ij}$ , ranging from attractive ( $k_{ij} = -0.01$ ) to repulsive ( $k_{ij} = +0.02$ ). Results are shown for a  $25k$  bead system and a  $102k$  bead system. The partial density of oligomers is shown by bold lines and the partial density of polymers shown by dashed lines. Surface enrichment varies from a small concentration increase at the surface to a pure squalane surface layer. An initial constant global squalane concentration of 40% was used for each simulation.

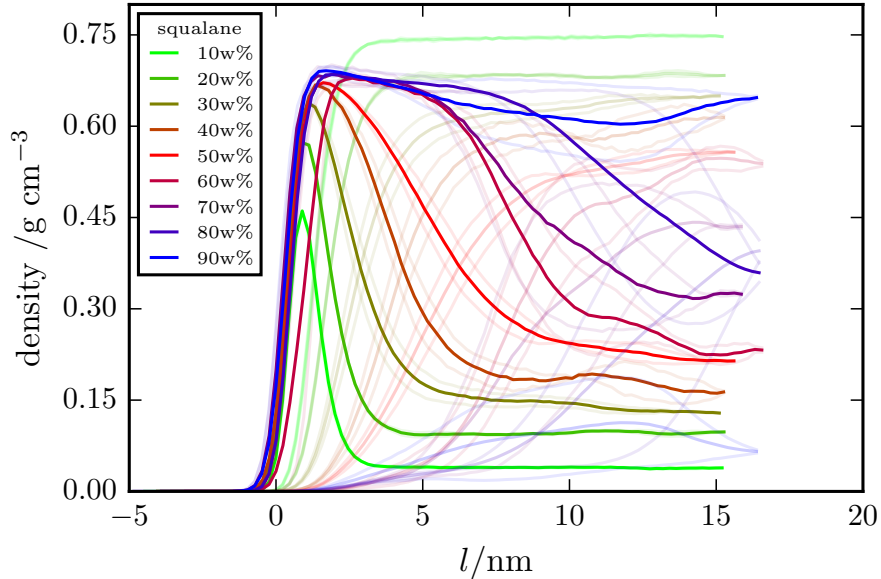

Figure 4: CGMD squalane surface profiles of a compatible system ( $k_{ij} = 0.0$ ) at several compositions. Lines of strong colour represent squalane concentrations, half-transparent lines represent polybutadiene concentrations. Concentration profiles are obtained from averaging both surfaces. The individual surface profiles are plotted in transparent lines.



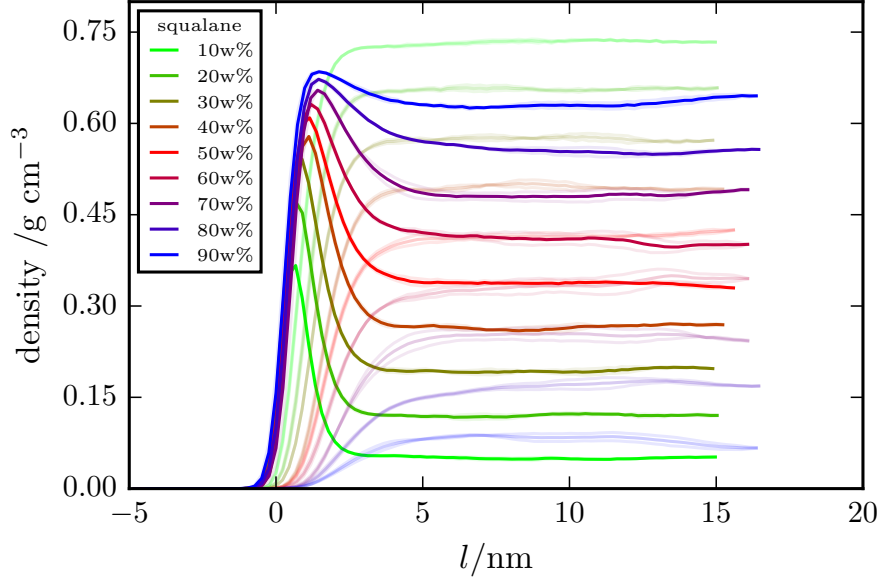

Figure 5: CGMD squalane surface profiles of a compatible system ( $k_{ij} = -0.00165$ ) at several compositions. Lines of strong colour represent squalane concentrations, half-transparent lines represent polybutadiene concentrations. Concentration profiles are obtained from averaging both surfaces. The individual surface profiles are plotted in transparent lines.

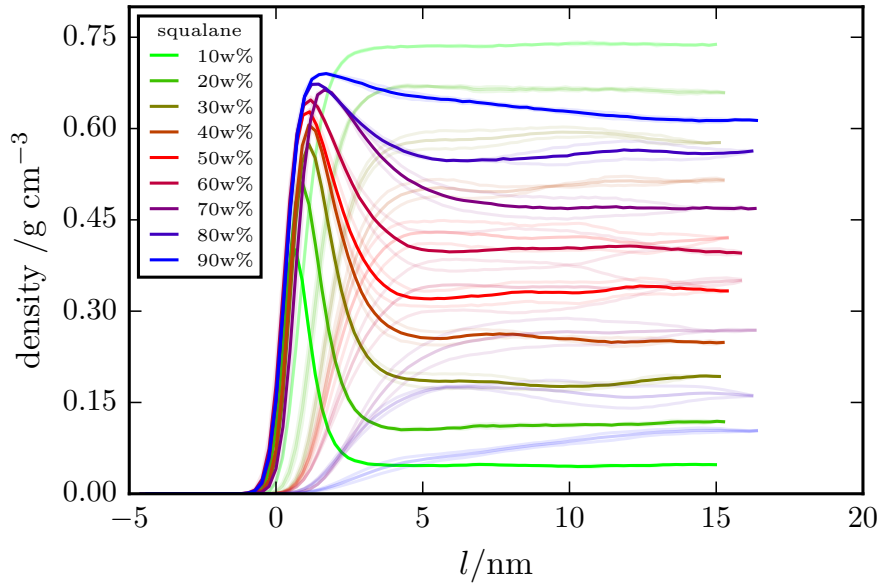

Figure 6: CGMD squalane surface profiles of a compatible system ( $k_{ij} = -0.01$ ) at several compositions. Lines of strong colour represent squalane concentrations, half-transparent lines represent polybutadiene concentrations. Concentration profiles are obtained from averaging both surfaces. The individual surface profiles are plotted in transparent lines.
